# Supplementary material
Source: PubMed Central journal article supplement (PMC3210421)
Supplement: NIHMS304556-supplement-02.pdf [file NIHMS304556-supplement-02.pdf]

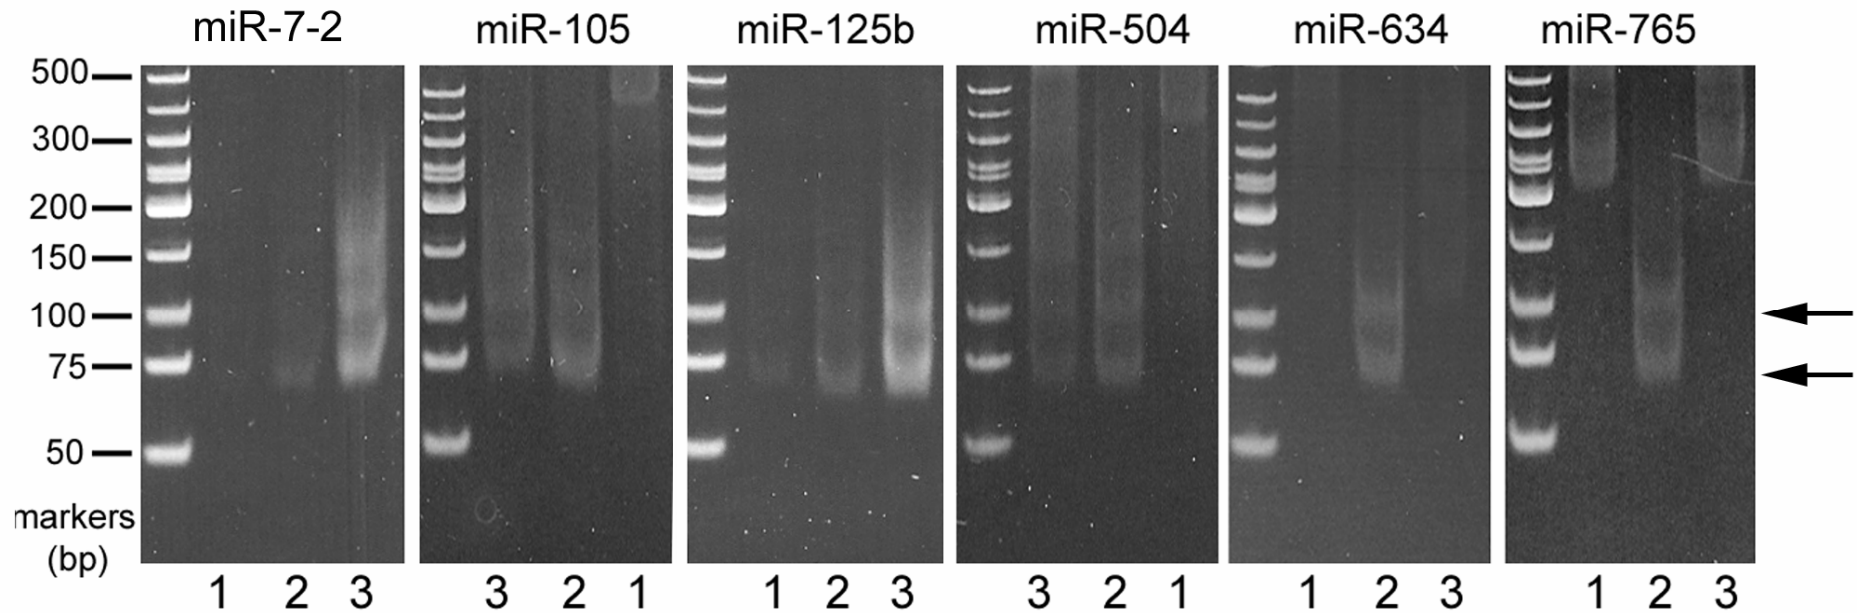

**Supplementary Figure 1.** PCR analyses of miRNA expression. PCR reactions were run on a 10% native polyacrylamide gel along with the Low Molecular Weight DNA Ladder (New England BioLabs; left lanes) and then stained with ethidium bromide. The *mirVana* miRNA Reference Panel v9.1 (Applied Biosystems) was included as positive controls in reverse transcription and PCR reactions. The cellular miRNAs yielded the same PCR products as the positive controls. Tested miRNAs are indicated on top. Lane 1: PCR products with cDNA from 5 ng RNA of untransfected 293T cells; lane 2: 2 amol reference miRNA pool as a positive control; lane 3: RNA from transfected cells. Arrows point to prominent PCR products resulting from mature miRNAs, as they were present in the control, reference miRNA lanes. The degree of miRNA overexpression can be estimated by comparing signal strength in lanes 2 and 3. Mature miR-634 and miR-765 were never detected.
